# Supplementary material
Source: PubMed Central journal article supplement (PMC4504988)
Supplement: NIHMS706165-supplement-Table_S1.pdf [file NIHMS706165-supplement-Table_S1.pdf]

**Table S1:** Pathological characteristics and available data of NK-cell lymphoma cases (A) and NK cell lines (B).

**A)**

| Samples | Age | Sex | Biopsy site           | Clinical subtype | CD3 $\epsilon$<br>(cyto-plasmic) | CD2 | CD5 | CD7 | CD4 | CD8 | CD56 | TiA1 | EBV | GEP data | Abnor-mal methyl-ation |
|---------|-----|-----|-----------------------|------------------|----------------------------------|-----|-----|-----|-----|-----|------|------|-----|----------|------------------------|
| NKCL-1  | 57  | M   | Nasal cavity          | Extra-nasal      | +                                | +   | -   |     | -   | -   | +    | +    | +   | +        | +                      |
| NKCL-2  | 40  | F   | Bone Marrow           | Extra-nasal      | +                                | NA  | -   | NA  | -   | +   | +    | +    | +   | +        | +                      |
| NKCL-3  | 68  | F   | Nasal cavity          | Nasal            | +                                | NA  | -   | NA  | NA  | NA  | +    | +    | +   | -        | +/-                    |
| NKCL-4  | 46  | F   | Nasal cavity          | Nasal            | +                                | +   | -   | +   | -   | -   | +    | +    | +   | +        | +                      |
| NKCL-5  | 48  | M   | Nasal cavity          | Nasal            | +                                | NA  | NA  | NA  | NA  | NA  | +    | +    | +   | -        | +                      |
| NKCL-6  | 79  | M   | Nasal cavity          | Nasal            | +                                | +   | -   | +   | -   | -   | +    | +    | +   | +        | +                      |
| NKCL-7  | 66  | M   | Testis (secondary)    | Nasal            | +                                | +   | -   | -   | -   | -   | +    | +    | +   | +        | +                      |
| NKCL-8  | 48  | F   | Bone Marrow           | Extra-nasal      | +                                | NA  | -   | NA  | NA  | NA  | +    | NA   | +   | -        | +                      |
| NKCL-9  | 67  | M   | Nasopharyngeal region | Extra-nasal      | +                                | +   | -   | +   | -   | +   | +    | +    | +   | -        | +/-                    |
| NKCL-10 | 48  | F   | Small bowel           | Extra-nasal      | +                                | +   | -   | +   | -   | -   | +    | +    | -   | +        | +                      |
| NKCL-11 | 42  | M   | Testis (secondary)    | Nasal            | +                                | +   | -   | NA  | NA  | NA  | +    | +    | +   | +        | +                      |
| NKCL-12 | 47  | F   | Small intestine       | Extra-nasal      | NA                               | +   | -   | +   | -   | -   | +    | NA   | -   | -        | +/-                    |

**B)**

| Cell line | Sex | Ethnicity | CD56 | EBV | Cytokine dependency | GEP data used | MSCC data |
|-----------|-----|-----------|------|-----|---------------------|---------------|-----------|
| KHYG1     | F   | Japanese  | +    | -   | IL-2                | +             | +         |
| NK-92     | M   | unknown   | +    | +   | IL-2                | +             | +         |
| YT        | M   | Japanese  | +    | +   | No                  | -             | -         |
| SNK-1     | M   | Japanese  | +    | +   | IL-2                | -             | -         |
| SNK-6     | M   | Japanese  | +    | +   | IL-2                | -             | -         |
| NK-YS     | F   | Japanese  | +    | +   | IL-2                | +             | -         |
| KAI3      | M   | Japanese  | +    | +   | IL-2                | -             | -         |

NA: Not available.
