# Supplementary material
Source: PubMed Central journal article supplement (PMC4504988)
Supplement: NIHMS706165-supplement-Table_S2.pdf [file NIHMS706165-supplement-Table_S2.pdf]

**Table S2: Basic sequencing statistics of NK samples**

| Sample      | Total sequences aligned with genome | Sequences randomly selected from total | Of the 16 M Sequences aligned with MSCC tags |
|-------------|-------------------------------------|----------------------------------------|----------------------------------------------|
| Normal NK-1 | 20,785,135                          | 16,000,000                             | 10,046,778                                   |
| Normal NK-2 | 20,785,135                          | 16,000,000                             | 10,045,209                                   |
| Normal NK-3 | 20,785,135                          | 16,000,000                             | 10,048,175                                   |
| Case-1      | 16,811,889                          | 16,000,000                             | 10,153,638                                   |
| Case-2      | 16,237,707                          | 16,000,000                             | 10,637,424                                   |
| Case-3      | 28,343,486                          | 16,000,000                             | 9,695,201                                    |
| Case-4      | 25,943,305                          | 16,000,000                             | 10,586,580                                   |
| Case-5      | 25,285,865                          | 16,000,000                             | 10,224,865                                   |
| Case-6      | 27,181,243                          | 16,000,000                             | 10,670,754                                   |
| Case-7      | 22,588,715                          | 16,000,000                             | 10,419,002                                   |
| Case-8      | 24,897,587                          | 16,000,000                             | 10,183,300                                   |
| Case-9      | 27,920,918                          | 16,000,000                             | 10,416,247                                   |
| Case-10     | 20,741,523                          | 16,000,000                             | 8,797,670                                    |
| Case-11     | 16,327,104                          | 16,000,000                             | 9,802,306                                    |
| Case-12     | 32,326,246                          | 16,000,000                             | 9,770,669                                    |
| KHYG1       | 26,345,811                          | 16,000,000                             | 11,387,656                                   |
| NK92        | 27,448,510                          | 16,000,000                             | 11,422,058                                   |

**Normal NK:** 48h IL2 activated human peripheral blood NK cells.
