# Supplementary material
Source: PubMed Central journal article supplement (PMC4504988)
Supplement: NIHMS706165-supplement-Table_S3.pdf [file NIHMS706165-supplement-Table_S3.pdf]

**Table S3. Genes with the best evidence for being silenced by promoter methylation.**

Genes of our list of 95 genes are shown in order of a derived linear predictor, followed by genes only on the longer list of 174 genes, followed by "near misses," which passed the expression filter and at least 3 of the 5 additional filters, had  $R > 0.35$ , and had  $\geq 1$  sample decreased for expression and MSCC. Orange background shows failed filters for each gene. Site numbers for genes with too few promoter sites with nonzero normal cut numbers to perform a Wilcoxon test are indicated in red.

|    | gene     | CGI promoter | poised promoter | in TSG list | promoter sites | r GEP vs MSCC | number MSCC down | number GEP down | MSCC SD | GEP SD | rank predictor |
|----|----------|--------------|-----------------|-------------|----------------|---------------|------------------|-----------------|---------|--------|----------------|
| 1  | GNLY     |              |                 |             | 1              | 0.707         | 6                | 10              | 2.078   | 3.880  | 1              |
| 2  | FAM26F   | TRUE         | TRUE            |             | 4              | 0.757         | 5                | 4               | 1.626   | 3.129  | 4              |
| 3  | PRDX2    | TRUE         |                 |             | 9              | 0.801         | 3                | 7               | 1.066   | 2.851  | 5              |
| 4  | ASNS     | TRUE         |                 |             | 4              | 0.799         | 4                | 8               | 1.196   | 2.602  | 6              |
| 5  | GNB4     | TRUE         | TRUE            |             | 7              | 0.775         | 6                | 3               | 1.649   | 2.561  | 8              |
| 6  | CD300A   |              | TRUE            |             | 7              | 0.863         | 5                | 5               | 1.132   | 2.268  | 9              |
| 7  | PLAC8    | TRUE         |                 |             | 7              | 0.716         | 6                | 5               | 0.769   | 2.605  | 11             |
| 8  | NRIP1    | TRUE         |                 |             | 12             | 0.846         | 6                | 4               | 1.114   | 2.105  | 13             |
| 9  | PQLC3    | TRUE         | TRUE            |             | 8              | 0.930         | 4                | 6               | 0.892   | 1.946  | 15             |
| 10 | PYCARD   | TRUE         | TRUE            | TRUE        | 7              | 0.918         | 4                | 3               | 1.057   | 2.052  | 17             |
| 11 | LEF1     | TRUE         | TRUE            |             | 9              | 0.837         | 5                | 9               | 1.522   | 1.735  | 20             |
| 12 | KLF11    | TRUE         | TRUE            |             | 14             | 0.755         | 9                | 8               | 0.926   | 1.832  | 22             |
| 13 | DLL1     | TRUE         | TRUE            |             | 8              | 0.712         | 4                | 8               | 1.472   | 2.140  | 26             |
| 14 | PSTPIP2  | TRUE         | TRUE            |             | 10             | 0.894         | 4                | 4               | 0.942   | 1.977  | 28             |
| 15 | GPX7     | TRUE         | TRUE            |             | 8              | 0.700         | 9                | 9               | 1.832   | 1.642  | 30             |
| 16 | DOCK5    | TRUE         | TRUE            |             | 14             | 0.705         | 4                | 9               | 1.636   | 1.988  | 33             |
| 17 | DDX3X    | TRUE         |                 | TRUE        | 14             | 0.795         | 3                | 9               | 1.196   | 1.977  | 34             |
| 18 | RNF130   | TRUE         |                 |             | 12             | 0.862         | 6                | 4               | 0.698   | 1.773  | 39             |
| 19 | TSPO     | TRUE         | TRUE            |             | 8              | 0.839         | 5                | 5               | 1.439   | 1.713  | 41             |
| 20 | ZNF518B  | TRUE         | TRUE            |             | 10             | 0.846         | 9                | 6               | 0.911   | 1.491  | 42             |
| 21 | ZFHX3    | TRUE         | TRUE            | TRUE        | 16             | 0.838         | 8                | 5               | 0.828   | 1.593  | 43             |
| 22 | GSN      | TRUE         | TRUE            |             | 21             | 0.799         | 5                | 4               | 0.758   | 1.929  | 45             |
| 23 | ARHGAP5  | TRUE         |                 |             | 8              | 0.793         | 3                | 8               | 1.375   | 1.870  | 46             |
| 24 | LPAR6    |              |                 |             | 2              | 0.663         | 4                | 6               | 1.317   | 2.142  | 48             |
| 25 | SCARNA17 | TRUE         |                 |             | 6              | 0.852         | 5                | 4               | 0.610   | 1.795  | 49             |
| 26 | GALNT11  | TRUE         |                 |             | 8              | 0.806         | 3                | 8               | 1.466   | 1.740  | 53             |
| 27 | IRF8     | TRUE         | TRUE            | TRUE        | 6              | 0.912         | 4                | 6               | 0.895   | 1.518  | 56             |
| 28 | C12orf57 | TRUE         |                 |             | 9              | 0.895         | 4                | 4               | 0.666   | 1.702  | 57             |
| 29 | TWSG1    | TRUE         | TRUE            |             | 10             | 0.827         | 5                | 5               | 1.463   | 1.557  | 60             |
| 30 | FILIP1L  | TRUE         | TRUE            |             | 7              | 0.759         | 6                | 3               | 1.988   | 1.645  | 61             |
| 31 | TET2     | TRUE         | TRUE            | TRUE        | 8              | 0.733         | 3                | 10              | 1.240   | 1.831  | 62             |
| 32 | HMG3     | TRUE         |                 |             | 3              | 0.684         | 3                | 8               | 0.683   | 2.163  | 63             |
| 33 | PTCH1    | TRUE         | TRUE            | TRUE        | 28             | 0.697         | 5                | 6               | 1.343   | 1.781  | 68             |
| 34 | ENPP4    |              |                 |             | 4              | 0.779         | 9                | 4               | 1.025   | 1.474  | 69             |
| 35 | DNAJA4   | TRUE         | TRUE            |             | 9              | 0.785         | 7                | 9               | 1.198   | 1.259  | 73             |
| 36 | PTPN6    |              |                 | TRUE        | 10             | 0.800         | 6                | 4               | 1.209   | 1.533  | 74             |

|    |          |      |      |      |    |       |    |    |       |       |     |
|----|----------|------|------|------|----|-------|----|----|-------|-------|-----|
| 37 | SH2B3    | TRUE |      |      | 13 | 0.665 | 4  | 10 | 0.737 | 1.848 | 76  |
| 38 | TP53INP1 | TRUE |      | TRUE | 9  | 0.778 | 4  | 4  | 0.712 | 1.842 | 79  |
| 39 | IL12RB2  | TRUE | TRUE |      | 5  | 0.670 | 4  | 6  | 1.222 | 1.909 | 82  |
| 40 | ZSCAN18  | TRUE |      |      | 11 | 0.753 | 9  | 4  | 1.227 | 1.435 | 83  |
| 41 | PATL2    |      |      |      | 2  | 0.733 | 10 | 8  | 1.683 | 1.144 | 84  |
| 42 | EIF5A2   | TRUE | TRUE |      | 9  | 0.667 | 5  | 10 | 0.833 | 1.641 | 89  |
| 43 | ADAM8    | TRUE | TRUE |      | 10 | 0.685 | 4  | 9  | 1.559 | 1.609 | 91  |
| 44 | PCTP     | TRUE |      |      | 5  | 0.751 | 4  | 5  | 1.107 | 1.718 | 93  |
| 45 | FBXO25   | TRUE |      |      | 2  | 0.822 | 3  | 8  | 2.106 | 1.334 | 95  |
| 46 | RREB1    | TRUE |      |      | 13 | 0.889 | 3  | 4  | 0.748 | 1.622 | 98  |
| 47 | RGS3     | TRUE | TRUE |      | 21 | 0.780 | 8  | 7  | 1.351 | 1.157 | 99  |
| 48 | LRP12    | TRUE |      |      | 10 | 0.689 | 5  | 8  | 1.177 | 1.568 | 102 |
| 49 | DAPK1    | TRUE |      | TRUE | 12 | 0.738 | 4  | 3  | 0.631 | 1.886 | 105 |
| 50 | TRIM44   | TRUE | TRUE |      | 8  | 0.700 | 7  | 4  | 0.932 | 1.617 | 106 |
| 51 | PDE4B    | TRUE | TRUE |      | 12 | 0.693 | 6  | 5  | 0.611 | 1.710 | 107 |
| 52 | DOK2     |      |      | TRUE | 4  | 0.795 | 3  | 10 | 1.543 | 1.348 | 110 |
| 53 | CPQ      | TRUE | TRUE |      | 3  | 0.917 | 4  | 5  | 1.709 | 1.091 | 115 |
| 54 | ALDH5A1  | TRUE | TRUE |      | 6  | 0.781 | 4  | 4  | 0.928 | 1.627 | 116 |
| 55 | SNX9     | TRUE |      |      | 15 | 0.675 | 8  | 5  | 1.010 | 1.512 | 120 |
| 56 | ZNF542   | TRUE |      |      | 5  | 0.751 | 7  | 8  | 1.871 | 1.049 | 121 |
| 57 | NIPA1    | TRUE | TRUE |      | 9  | 0.683 | 5  | 8  | 1.327 | 1.456 | 124 |
| 58 | BCL2L11  | TRUE | TRUE |      | 9  | 0.716 | 3  | 8  | 1.622 | 1.569 | 125 |
| 59 | SPOCK2   | TRUE | TRUE |      | 6  | 0.698 | 5  | 7  | 0.613 | 1.596 | 128 |
| 60 | NFATC1   | TRUE | TRUE |      | 29 | 0.788 | 7  | 6  | 1.003 | 1.189 | 129 |
| 61 | TMEM181  | TRUE |      |      | 8  | 0.709 | 8  | 7  | 1.439 | 1.141 | 136 |
| 62 | SFMBT2   | TRUE | TRUE |      | 21 | 0.875 | 5  | 4  | 0.615 | 1.222 | 140 |
| 63 | MSRB2    | TRUE |      |      | 5  | 0.699 | 3  | 3  | 1.401 | 1.818 | 142 |
| 64 | RHOBTB3  | TRUE | TRUE |      | 5  | 0.735 | 5  | 4  | 1.197 | 1.444 | 148 |
| 65 | ZNF32    | TRUE | TRUE |      | 8  | 0.786 | 6  | 3  | 0.939 | 1.330 | 149 |
| 66 | HPGD     | TRUE | TRUE | TRUE | 7  | 0.681 | 3  | 3  | 0.911 | 1.930 | 151 |
| 67 | NAP1L5   |      |      |      | 2  | 0.665 | 3  | 8  | 1.425 | 1.613 | 152 |
| 68 | NEK6     | TRUE |      |      | 15 | 0.793 | 7  | 4  | 0.957 | 1.174 | 154 |
| 69 | TLE1     | TRUE |      |      | 9  | 0.684 | 3  | 4  | 1.483 | 1.748 | 157 |
| 70 | MVP      |      |      |      | 6  | 0.714 | 5  | 5  | 1.458 | 1.361 | 159 |
| 71 | SYTL2    | TRUE | TRUE |      | 10 | 0.720 | 4  | 5  | 0.653 | 1.572 | 167 |
| 72 | C3AR1    |      |      |      | 1  | 0.728 | 4  | 3  | 1.612 | 1.463 | 169 |
| 73 | CD3D     |      |      |      | 3  | 0.713 | 3  | 6  | 1.572 | 1.459 | 181 |
| 74 | ZNF280D  | TRUE |      |      | 6  | 0.772 | 4  | 7  | 1.142 | 1.172 | 184 |
| 75 | SLCO3A1  | TRUE | TRUE |      | 12 | 0.738 | 7  | 5  | 0.740 | 1.121 | 198 |
| 76 | GPHN     | TRUE |      |      | 7  | 0.747 | 3  | 4  | 1.273 | 1.430 | 205 |
| 77 | DPEP2    |      |      |      | 1  | 0.672 | 7  | 6  | 1.319 | 1.089 | 211 |
| 78 | TNFRSF4  | TRUE |      |      | 7  | 0.678 | 5  | 8  | 1.393 | 1.100 | 213 |
| 79 | SERPINB6 | TRUE |      |      | 9  | 0.741 | 4  | 3  | 0.607 | 1.439 | 217 |
| 80 | SOX4     | TRUE |      |      | 3  | 0.681 | 4  | 3  | 0.747 | 1.532 | 232 |
| 81 | PAM      | TRUE |      |      | 6  | 0.727 | 3  | 3  | 1.447 | 1.425 | 238 |
| 82 | SBF2     | TRUE |      |      | 8  | 0.755 | 3  | 3  | 0.840 | 1.464 | 240 |
| 83 | QDPR     | TRUE |      |      | 6  | 0.651 | 5  | 3  | 1.118 | 1.408 | 244 |

|     |          |      |      |      |    |       |   |    |       |       |     |
|-----|----------|------|------|------|----|-------|---|----|-------|-------|-----|
| 84  | DCBLD1   | TRUE | TRUE |      | 10 | 0.724 | 4 | 4  | 0.971 | 1.273 | 259 |
| 85  | NAPEPLD  | TRUE |      | TRUE | 5  | 0.830 | 3 | 3  | 0.895 | 1.203 | 264 |
| 86  | LZTFL1   | TRUE |      |      | 8  | 0.666 | 5 | 8  | 0.624 | 1.162 | 265 |
| 87  | BOLA1    | TRUE |      |      | 5  | 0.717 | 3 | 3  | 1.534 | 1.363 | 267 |
| 88  | DNAJC4   | TRUE |      |      | 8  | 0.711 | 4 | 5  | 1.480 | 1.084 | 290 |
| 89  | SOCS6    | TRUE |      |      | 6  | 0.724 | 3 | 6  | 1.257 | 1.180 | 296 |
| 90  | IGF2BP2  | TRUE |      |      | 12 | 0.672 | 6 | 4  | 0.999 | 1.050 | 333 |
| 91  | ARRB1    | TRUE | TRUE |      | 7  | 0.732 | 3 | 8  | 0.690 | 1.081 | 338 |
| 92  | CEP192   | TRUE |      |      | 7  | 0.652 | 5 | 6  | 0.753 | 1.093 | 349 |
| 93  | PCYOX1   | TRUE |      |      | 4  | 0.676 | 4 | 5  | 1.018 | 1.118 | 362 |
| 94  | NEDD4    | TRUE | TRUE |      | 9  | 0.662 | 5 | 3  | 0.591 | 1.229 | 365 |
| 95  | HHEX     | TRUE | TRUE |      | 15 | 0.685 | 3 | 3  | 0.943 | 1.140 | 499 |
| 96  | KLRF1    |      |      |      | 2  | 0.573 | 9 | 9  | 1.884 | 3.554 | 2   |
| 97  | FGFBP2   |      |      |      | 2  | 0.641 | 9 | 9  | 1.838 | 3.150 | 3   |
| 98  | FCER1G   |      |      |      | 2  | 0.563 | 9 | 6  | 2.145 | 2.680 | 7   |
| 99  | TNFRSF18 | TRUE | TRUE |      | 10 | 0.632 | 6 | 9  | 0.745 | 2.349 | 16  |
| 100 | ITGAM    |      |      |      | 2  | 0.607 | 6 | 8  | 1.945 | 2.133 | 24  |
| 101 | CTBP2    | TRUE |      | TRUE | 23 | 0.560 | 5 | 8  | 0.939 | 2.519 | 27  |
| 102 | ITGAV    | TRUE |      | TRUE | 9  | 0.640 | 7 | 5  | 1.386 | 2.122 | 35  |
| 103 | ZNF395   | TRUE | TRUE |      | 10 | 0.635 | 8 | 6  | 1.469 | 1.918 | 44  |
| 104 | MXRA7    | TRUE | TRUE |      | 8  | 0.608 | 5 | 10 | 0.940 | 1.998 | 51  |
| 105 | RAB8B    | TRUE |      |      | 3  | 0.531 | 7 | 8  | 2.136 | 1.914 | 52  |
| 106 | FHL1     | TRUE | TRUE |      | 16 | 0.636 | 6 | 4  | 0.992 | 2.112 | 55  |
| 107 | LXN      |      |      | TRUE | 3  | 0.519 | 8 | 4  | 2.006 | 2.084 | 58  |
| 108 | GPR114   |      |      |      | 1  | 0.603 | 5 | 9  | 1.744 | 1.825 | 65  |
| 109 | RAB37    | TRUE | TRUE |      | 16 | 0.643 | 6 | 4  | 0.603 | 2.079 | 67  |
| 110 | PARP15   |      | TRUE |      | 1  | 0.579 | 8 | 10 | 1.763 | 1.575 | 71  |
| 111 | ADAMTS1  | TRUE | TRUE |      | 11 | 0.573 | 7 | 9  | 1.689 | 1.622 | 87  |
| 112 | ARMCX5   | TRUE |      |      | 1  | 0.627 | 5 | 8  | 2.091 | 1.604 | 88  |
| 113 | ZBTB16   | TRUE | TRUE | TRUE | 17 | 0.580 | 5 | 8  | 1.230 | 1.884 | 90  |
| 114 | SYTL1    |      |      |      | 4  | 0.648 | 3 | 9  | 1.406 | 1.877 | 92  |
| 115 | MX1      | TRUE | TRUE |      | 12 | 0.588 | 6 | 3  | 0.821 | 2.066 | 100 |
| 116 | FAM221A  | TRUE |      |      | 8  | 0.640 | 5 | 10 | 1.623 | 1.510 | 101 |
| 117 | GPR137B  | TRUE | TRUE |      | 11 | 0.639 | 4 | 5  | 0.630 | 2.042 | 103 |
| 118 | SRSF11   | TRUE |      |      | 1  | 0.631 | 7 | 6  | 1.655 | 1.555 | 104 |
| 119 | HSD17B11 |      |      |      | 4  | 0.584 | 6 | 5  | 1.024 | 1.900 | 109 |
| 120 | RNF165   | TRUE | TRUE |      | 7  | 0.503 | 7 | 10 | 1.739 | 1.637 | 111 |
| 121 | TMCC3    | TRUE | TRUE |      | 6  | 0.552 | 6 | 5  | 1.446 | 1.827 | 126 |
| 122 | TESPA1   |      |      |      | 4  | 0.509 | 8 | 8  | 1.358 | 1.579 | 146 |
| 123 | LLGL2    | TRUE |      |      | 12 | 0.606 | 8 | 9  | 1.683 | 1.221 | 147 |
| 124 | PLEKHA1  | TRUE | TRUE |      | 13 | 0.568 | 3 | 4  | 1.284 | 2.104 | 150 |
| 125 | PLK2     | TRUE |      | TRUE | 8  | 0.623 | 5 | 3  | 1.284 | 1.741 | 153 |
| 126 | IGF1R    | TRUE |      |      | 11 | 0.598 | 9 | 5  | 1.305 | 1.442 | 155 |
| 127 | TNFSF11  | TRUE |      |      | 5  | 0.568 | 4 | 8  | 1.553 | 1.671 | 158 |
| 128 | SCRN1    | TRUE |      |      | 11 | 0.522 | 4 | 6  | 1.135 | 1.954 | 160 |
| 129 | IRS2     | TRUE |      |      | 11 | 0.617 | 9 | 3  | 1.696 | 1.392 | 163 |
| 130 | AKAP7    | TRUE |      |      | 9  | 0.502 | 7 | 7  | 0.686 | 1.774 | 165 |

|     |           |      |      |      |    |       |    |    |       |       |     |
|-----|-----------|------|------|------|----|-------|----|----|-------|-------|-----|
| 131 | CTH       | TRUE |      |      | 2  | 0.505 | 9  | 4  | 1.845 | 1.533 | 178 |
| 132 | PAWR      | TRUE |      | TRUE | 11 | 0.635 | 5  | 3  | 1.589 | 1.531 | 183 |
| 133 | GAS1      | TRUE |      | TRUE | 12 | 0.541 | 4  | 3  | 0.733 | 1.976 | 197 |
| 134 | ZNF605    | TRUE |      |      | 4  | 0.596 | 7  | 8  | 1.588 | 1.164 | 199 |
| 135 | GBP2      |      |      |      | 1  | 0.576 | 10 | 3  | 2.125 | 1.201 | 202 |
| 136 | MYH10     | TRUE |      |      | 15 | 0.603 | 5  | 4  | 0.796 | 1.620 | 206 |
| 137 | PER3      | TRUE | TRUE |      | 12 | 0.641 | 7  | 4  | 1.166 | 1.289 | 215 |
| 138 | CD52      |      |      |      | 1  | 0.524 | 3  | 6  | 1.427 | 1.827 | 221 |
| 139 | FAM46A    | TRUE |      |      | 6  | 0.502 | 3  | 4  | 1.102 | 2.041 | 223 |
| 140 | THEMIS2   | TRUE |      |      | 8  | 0.592 | 3  | 6  | 0.813 | 1.747 | 230 |
| 141 | MAP9      | TRUE |      |      | 4  | 0.606 | 4  | 9  | 1.655 | 1.238 | 239 |
| 142 | SLFN12    |      | TRUE |      | 5  | 0.519 | 8  | 9  | 1.526 | 1.167 | 241 |
| 143 | ZNF300    | TRUE |      |      | 3  | 0.530 | 6  | 7  | 1.533 | 1.360 | 242 |
| 144 | RASSF8    |      |      | TRUE | 9  | 0.540 | 5  | 9  | 1.375 | 1.328 | 245 |
| 145 | NACC2     | TRUE | TRUE |      | 12 | 0.521 | 3  | 8  | 0.925 | 1.757 | 251 |
| 146 | MYO6      | TRUE |      |      | 8  | 0.537 | 5  | 5  | 0.681 | 1.626 | 268 |
| 147 | MAF       | TRUE |      | TRUE | 14 | 0.528 | 3  | 5  | 0.871 | 1.867 | 269 |
| 148 | SMIM3     | TRUE |      |      | 3  | 0.573 | 6  | 6  | 1.260 | 1.260 | 280 |
| 149 | ULK2      | TRUE | TRUE |      | 8  | 0.629 | 3  | 10 | 0.761 | 1.304 | 301 |
| 150 | CD7       |      |      |      | 6  | 0.550 | 3  | 7  | 1.142 | 1.566 | 311 |
| 151 | CRY1      | TRUE |      |      | 7  | 0.534 | 3  | 10 | 0.944 | 1.490 | 314 |
| 152 | B3GALNT1  | TRUE | TRUE |      | 7  | 0.628 | 3  | 8  | 1.164 | 1.301 | 316 |
| 153 | CYB5A     | TRUE |      |      | 5  | 0.566 | 4  | 3  | 0.866 | 1.608 | 319 |
| 154 | TCEAL3    | TRUE |      |      | 3  | 0.574 | 5  | 3  | 1.318 | 1.372 | 332 |
| 155 | ZFP30     | TRUE |      |      | 4  | 0.510 | 6  | 9  | 1.118 | 1.160 | 345 |
| 156 | NREP      | TRUE |      |      | 6  | 0.577 | 3  | 7  | 1.194 | 1.394 | 356 |
| 157 | SH3TC1    |      |      |      | 9  | 0.644 | 5  | 6  | 0.668 | 1.114 | 360 |
| 158 | ASCL2     | TRUE | TRUE |      | 11 | 0.502 | 7  | 4  | 1.083 | 1.339 | 364 |
| 159 | SERP2     | TRUE | TRUE |      | 10 | 0.571 | 6  | 3  | 1.309 | 1.220 | 382 |
| 160 | HIC1      | TRUE | TRUE | TRUE | 16 | 0.645 | 4  | 5  | 0.819 | 1.199 | 389 |
| 161 | KIF16B    | TRUE |      |      | 5  | 0.639 | 4  | 3  | 1.650 | 1.106 | 414 |
| 162 | ZFP3      | TRUE | TRUE |      | 4  | 0.513 | 5  | 4  | 0.934 | 1.388 | 425 |
| 163 | GPR125    | TRUE |      |      | 4  | 0.514 | 7  | 7  | 0.852 | 1.094 | 428 |
| 164 | PIK3IP1   |      | TRUE |      | 3  | 0.540 | 7  | 3  | 1.039 | 1.181 | 437 |
| 165 | GNA15     |      |      |      | 10 | 0.516 | 5  | 4  | 0.814 | 1.351 | 453 |
| 166 | LTBP3     | TRUE | TRUE |      | 12 | 0.629 | 3  | 7  | 0.701 | 1.188 | 457 |
| 167 | HIST1H2BE |      |      |      | 3  | 0.524 | 5  | 5  | 1.570 | 1.066 | 505 |
| 168 | SLC25A13  | TRUE |      |      | 9  | 0.604 | 4  | 3  | 0.788 | 1.189 | 525 |
| 169 | INPP5A    | TRUE | TRUE |      | 12 | 0.564 | 4  | 5  | 0.833 | 1.141 | 557 |
| 170 | CAMK1     | TRUE | TRUE |      | 8  | 0.528 | 3  | 4  | 1.105 | 1.232 | 657 |
| 171 | USP46     | TRUE |      |      | 9  | 0.510 | 3  | 8  | 0.737 | 1.102 | 690 |
| 172 | CBR3      | TRUE | TRUE |      | 7  | 0.527 | 3  | 4  | 0.875 | 1.187 | 736 |
| 173 | DHRS11    | TRUE |      |      | 7  | 0.504 | 3  | 3  | 0.730 | 1.160 | 914 |
| 174 | ZNF518A   | TRUE |      |      | 8  | 0.521 | 3  | 3  | 0.657 | 1.067 | 984 |
| 175 | AKR1C3    |      |      |      | 1  | 0.444 | 5  | 10 | 1.279 | 2.916 | 12  |
| 176 | OAT       | TRUE |      |      | 14 | 0.928 | 2  | 7  | 0.671 | 2.299 | 18  |
| 177 | HINT1     | TRUE |      | TRUE | 6  | 0.719 | 2  | 7  | 0.789 | 2.797 | 19  |

|     |           |      |      |      |    |       |    |   |       |       |     |
|-----|-----------|------|------|------|----|-------|----|---|-------|-------|-----|
| 178 | CPNE3     | TRUE |      |      | 5  | 0.866 | 2  | 8 | 1.218 | 2.273 | 21  |
| 179 | HBA1      |      |      |      | 1  | 0.604 | 2  | 3 | 1.773 | 3.028 | 23  |
| 180 | S1PR5     | TRUE | TRUE |      | 7  | 0.374 | 5  | 8 | 1.421 | 2.852 | 31  |
| 181 | C1orf162  |      |      |      | 1  | 0.638 | 5  | 2 | 1.606 | 2.424 | 32  |
| 182 | C12orf23  | TRUE | TRUE |      | 7  | 0.787 | 3  | 7 | 0.427 | 2.216 | 37  |
| 183 | TSC22D3   | TRUE | TRUE |      | 19 | 0.677 | 7  | 3 | 0.553 | 2.260 | 38  |
| 184 | ITM2A     |      |      |      | 4  | 0.813 | 2  | 6 | 1.520 | 2.143 | 47  |
| 185 | CSF2RB    |      | TRUE |      | 3  | 0.745 | 3  | 2 | 1.004 | 2.318 | 50  |
| 186 | CYP1B1    | TRUE | TRUE |      | 11 | 0.691 | 8  | 2 | 1.703 | 1.817 | 54  |
| 187 | HINT3     | TRUE |      |      | 5  | 0.783 | 5  | 7 | 0.493 | 1.697 | 66  |
| 188 | SLC2A14   | TRUE |      |      | 5  | 0.782 | 10 | 9 | 1.812 | 1.010 | 70  |
| 189 | NETO2     | TRUE | TRUE |      | 11 | 0.705 | 6  | 2 | 1.654 | 1.800 | 72  |
| 190 | NTRK2     | TRUE | TRUE |      | 13 | 0.598 | 7  | 1 | 1.205 | 2.127 | 75  |
| 191 | TMEM71    |      |      |      | 1  | 0.456 | 6  | 8 | 0.940 | 2.224 | 80  |
| 192 | METTL7A   |      |      |      | 6  | 0.733 | 5  | 2 | 0.787 | 1.927 | 81  |
| 193 | VAMP8     |      |      |      | 3  | 0.801 | 2  | 4 | 1.035 | 2.102 | 86  |
| 194 | CPT1A     | TRUE | TRUE |      | 10 | 0.814 | 2  | 9 | 0.630 | 1.843 | 94  |
| 195 | CD55      | TRUE |      |      | 5  | 0.786 | 2  | 9 | 0.768 | 1.884 | 97  |
| 196 | PERP      | TRUE | TRUE |      | 4  | 0.455 | 4  | 6 | 1.407 | 2.276 | 112 |
| 197 | ZNF814    | TRUE |      |      | 3  | 0.764 | 10 | 9 | 1.763 | 0.863 | 114 |
| 198 | LACC1     | TRUE |      |      | 6  | 0.758 | 5  | 1 | 1.397 | 1.642 | 117 |
| 199 | CD160     |      |      |      | 1  | 0.423 | 8  | 4 | 1.001 | 2.203 | 119 |
| 200 | SORL1     | TRUE |      |      | 8  | 0.435 | 4  | 9 | 0.834 | 2.251 | 122 |
| 201 | HIPK2     | TRUE |      | TRUE | 5  | 0.804 | 1  | 9 | 0.693 | 2.215 | 130 |
| 202 | FNIP2     | TRUE |      |      | 8  | 0.657 | 3  | 6 | 0.583 | 1.985 | 131 |
| 203 | CXCL2     | TRUE |      |      | 3  | 0.863 | 9  | 1 | 1.179 | 1.085 | 132 |
| 204 | SLAMF1    |      |      |      | 2  | 0.562 | 9  | 2 | 1.765 | 1.655 | 135 |
| 205 | MEIS2     | TRUE | TRUE |      | 20 | 0.507 | 9  | 1 | 0.802 | 2.016 | 138 |
| 206 | YES1      | TRUE |      |      | 11 | 0.633 | 4  | 9 | 0.565 | 1.695 | 141 |
| 207 | GNAQ      | TRUE |      |      | 12 | 0.763 | 2  | 5 | 0.985 | 1.889 | 143 |
| 208 | LOC550643 |      |      |      | 4  | 0.764 | 2  | 7 | 1.335 | 1.718 | 144 |
| 209 | TDG       | TRUE |      |      | 2  | 0.886 | 8  | 8 | 0.870 | 0.670 | 161 |
| 210 | RAB38     | TRUE |      |      | 5  | 0.705 | 9  | 8 | 1.230 | 1.007 | 162 |
| 211 | SVIP      | TRUE | TRUE |      | 2  | 0.367 | 9  | 7 | 1.489 | 1.861 | 164 |
| 212 | RASEF     | TRUE | TRUE |      | 9  | 0.450 | 9  | 4 | 1.241 | 1.836 | 166 |
| 213 | PAK1      | TRUE |      |      | 9  | 0.899 | 5  | 4 | 1.255 | 0.944 | 168 |
| 214 | ZNF91     |      |      |      | 5  | 0.377 | 3  | 7 | 0.889 | 2.437 | 170 |
| 215 | P4HB      |      |      |      | 2  | 0.787 | 9  | 3 | 2.818 | 0.718 | 171 |
| 216 | DHRS7     | TRUE |      |      | 4  | 0.693 | 10 | 9 | 1.523 | 0.855 | 172 |
| 217 | NAPRT1    | TRUE |      |      | 11 | 0.899 | 9  | 3 | 1.507 | 0.680 | 173 |
| 218 | SUOX      |      |      |      | 8  | 0.875 | 9  | 5 | 0.685 | 0.791 | 174 |
| 219 | ADRB2     | TRUE | TRUE |      | 7  | 0.546 | 2  | 9 | 1.171 | 2.085 | 175 |
| 220 | TJP2      | TRUE | TRUE |      | 16 | 0.493 | 9  | 3 | 0.941 | 1.791 | 177 |
| 221 | CYFIP1    | TRUE | TRUE |      | 13 | 0.792 | 4  | 8 | 0.566 | 1.211 | 179 |
| 222 | TAGAP     |      |      |      | 4  | 0.449 | 3  | 9 | 0.610 | 2.169 | 180 |
| 223 | ATP9A     | TRUE |      |      | 6  | 0.653 | 10 | 1 | 1.216 | 1.344 | 185 |
| 224 | RGPD5     | TRUE |      |      | 1  | 0.865 | 5  | 6 | 1.714 | 0.758 | 186 |

|     |            |      |      |      |    |       |    |    |       |       |     |
|-----|------------|------|------|------|----|-------|----|----|-------|-------|-----|
| 225 | ZNF347     | TRUE |      |      | 8  | 0.725 | 9  | 5  | 1.212 | 1.002 | 187 |
| 226 | MYO1E      | TRUE |      |      | 7  | 0.704 | 10 | 7  | 1.191 | 0.903 | 190 |
| 227 | CD79B      |      |      |      | 8  | 0.771 | 6  | 7  | 1.276 | 0.929 | 192 |
| 228 | VPS26A     | TRUE |      |      | 5  | 0.566 | 1  | 3  | 0.898 | 2.825 | 193 |
| 229 | IL21R      |      |      |      | 3  | 0.836 | 4  | 1  | 1.020 | 1.290 | 195 |
| 230 | PLEK       |      |      |      | 3  | 0.413 | 5  | 4  | 1.351 | 2.028 | 196 |
| 231 | STX17      | TRUE |      |      | 3  | 0.740 | 7  | 6  | 1.849 | 0.846 | 200 |
| 232 | TMSB15B    | TRUE |      |      | 7  | 0.797 | 5  | 5  | 1.714 | 0.922 | 201 |
| 233 | SORT1      | TRUE |      |      | 9  | 0.931 | 3  | 1  | 1.149 | 1.143 | 203 |
| 234 | GBP5       |      |      |      | 1  | 0.356 | 7  | 3  | 1.028 | 2.112 | 204 |
| 235 | NEIL1      | TRUE | TRUE |      | 11 | 0.834 | 7  | 3  | 1.291 | 0.842 | 207 |
| 236 | NME3       | TRUE |      |      | 10 | 0.821 | 4  | 8  | 1.153 | 0.903 | 208 |
| 237 | ZNF677     | TRUE |      |      | 3  | 0.463 | 8  | 7  | 2.026 | 1.367 | 212 |
| 238 | DDX43      | TRUE |      |      | 5  | 0.722 | 5  | 8  | 1.487 | 0.970 | 214 |
| 239 | PRSS23     | TRUE | TRUE |      | 10 | 0.413 | 7  | 3  | 0.940 | 1.955 | 216 |
| 240 | AAED1      | TRUE |      |      | 6  | 0.622 | 5  | 6  | 0.569 | 1.490 | 218 |
| 241 | SGCB       | TRUE |      |      | 7  | 0.713 | 6  | 1  | 1.064 | 1.335 | 220 |
| 242 | VAV3       | TRUE |      |      | 7  | 0.785 | 2  | 5  | 1.060 | 1.542 | 222 |
| 243 | EIF4EBP1   | TRUE |      |      | 7  | 0.834 | 3  | 2  | 0.633 | 1.385 | 225 |
| 244 | ZNF256     | TRUE |      |      | 8  | 0.486 | 7  | 9  | 1.118 | 1.407 | 226 |
| 245 | ZNF394     | TRUE |      |      | 7  | 0.772 | 5  | 7  | 1.470 | 0.861 | 228 |
| 246 | MGAT4A     | TRUE | TRUE |      | 8  | 0.737 | 1  | 7  | 0.907 | 2.081 | 229 |
| 247 | SPAG16     | TRUE |      |      | 3  | 0.499 | 6  | 7  | 1.653 | 1.433 | 231 |
| 248 | ZBTB4      | TRUE |      |      | 10 | 0.781 | 2  | 4  | 0.674 | 1.647 | 233 |
| 249 | TMEM65     | TRUE | TRUE |      | 9  | 0.866 | 5  | 3  | 0.800 | 0.947 | 234 |
| 250 | GPR56      |      |      |      | 15 | 0.390 | 3  | 5  | 1.077 | 2.249 | 237 |
| 251 | RASGEF1A   | TRUE | TRUE |      | 17 | 0.395 | 6  | 5  | 0.786 | 1.940 | 243 |
| 252 | ZNF140     | TRUE |      |      | 7  | 0.823 | 2  | 3  | 0.835 | 1.528 | 246 |
| 253 | ZDHHC2     | TRUE |      | TRUE | 8  | 0.596 | 1  | 9  | 0.816 | 2.310 | 249 |
| 254 | KLF3       | TRUE |      |      | 9  | 0.943 | 2  | 3  | 0.734 | 1.235 | 250 |
| 255 | SERPINE2   | TRUE | TRUE |      | 11 | 0.386 | 3  | 4  | 0.762 | 2.330 | 252 |
| 256 | DLGAP1-AS1 |      |      |      | 2  | 0.867 | 4  | 9  | 0.945 | 0.676 | 253 |
| 257 | CPT1B      | TRUE |      |      | 11 | 0.669 | 9  | 3  | 1.376 | 1.036 | 254 |
| 258 | ERRFI1     | TRUE | TRUE | TRUE | 12 | 0.707 | 8  | 2  | 1.250 | 1.060 | 255 |
| 259 | UBE2F      |      |      |      | 1  | 0.704 | 8  | 8  | 2.046 | 0.612 | 256 |
| 260 | WWC2       | TRUE |      |      | 5  | 0.857 | 8  | 3  | 1.723 | 0.528 | 260 |
| 261 | TMEM66     | TRUE |      |      | 6  | 0.506 | 1  | 6  | 0.785 | 2.672 | 261 |
| 262 | TOR4A      | TRUE | TRUE |      | 9  | 0.664 | 8  | 8  | 1.710 | 0.761 | 262 |
| 263 | DEPDC1     | TRUE |      |      | 2  | 0.467 | 4  | 4  | 1.784 | 1.749 | 266 |
| 264 | ARHGAP8    |      | TRUE |      | 8  | 0.763 | 7  | 3  | 1.455 | 0.849 | 270 |
| 265 | DHRS3      | TRUE |      |      | 11 | 0.612 | 2  | 8  | 0.743 | 1.769 | 271 |
| 266 | SYNJ2      | TRUE | TRUE |      | 14 | 0.484 | 3  | 9  | 0.808 | 1.766 | 274 |
| 267 | JAG2       |      | TRUE |      | 10 | 0.699 | 8  | 8  | 1.277 | 0.719 | 275 |
| 268 | ECHDC2     | TRUE | TRUE |      | 2  | 0.610 | 5  | 10 | 1.674 | 0.974 | 276 |
| 269 | TMEM237    | TRUE |      |      | 4  | 0.601 | 7  | 1  | 2.550 | 1.129 | 278 |
| 270 | TYROBP     |      |      |      | 5  | 0.370 | 3  | 5  | 1.234 | 2.162 | 282 |
| 271 | TNFSF8     |      |      |      | 2  | 0.770 | 4  | 5  | 2.247 | 0.805 | 283 |

|     |           |      |      |      |    |       |    |    |       |       |     |
|-----|-----------|------|------|------|----|-------|----|----|-------|-------|-----|
| 272 | MLC1      |      |      |      | 3  | 0.499 | 5  | 6  | 1.151 | 1.543 | 284 |
| 273 | TECPR1    | TRUE |      |      | 7  | 0.813 | 7  | 4  | 0.652 | 0.791 | 286 |
| 274 | ZNF177    | TRUE |      |      | 4  | 0.867 | 7  | 3  | 1.533 | 0.526 | 288 |
| 275 | ZNF717    |      |      |      | 2  | 0.786 | 5  | 7  | 2.209 | 0.549 | 289 |
| 276 | MAGEH1    |      |      |      | 3  | 0.459 | 8  | 6  | 1.653 | 1.317 | 293 |
| 277 | SETD7     | TRUE | TRUE |      | 15 | 0.685 | 4  | 3  | 0.566 | 1.417 | 294 |
| 278 | LAT2      |      |      |      | 4  | 0.366 | 6  | 10 | 0.619 | 1.668 | 297 |
| 279 | EGR3      | TRUE | TRUE |      | 16 | 0.442 | 5  | 8  | 1.378 | 1.511 | 298 |
| 280 | AP4S1     | TRUE |      |      | 7  | 0.757 | 9  | 6  | 1.193 | 0.593 | 299 |
| 281 | SFXN3     |      | TRUE |      | 3  | 0.687 | 5  | 4  | 1.583 | 1.049 | 300 |
| 282 | HPSE      | TRUE | TRUE |      | 2  | 0.580 | 5  | 2  | 1.508 | 1.427 | 304 |
| 283 | ZNF805    | TRUE |      |      | 8  | 0.663 | 5  | 7  | 1.370 | 0.990 | 305 |
| 284 | PDLIM1    | TRUE | TRUE |      | 12 | 0.817 | 3  | 1  | 0.840 | 1.255 | 306 |
| 285 | MAP3K8    | TRUE |      |      | 13 | 0.507 | 3  | 10 | 0.546 | 1.642 | 307 |
| 286 | IFITM3    |      |      |      | 1  | 0.416 | 8  | 3  | 1.702 | 1.541 | 308 |
| 287 | TGFBR3    | TRUE | TRUE | TRUE | 11 | 0.505 | 3  | 10 | 0.457 | 1.664 | 309 |
| 288 | ZNF285    |      |      |      | 1  | 0.648 | 10 | 4  | 1.523 | 0.843 | 310 |
| 289 | LOC654433 | TRUE |      |      | 9  | 0.711 | 2  | 5  | 1.469 | 1.449 | 313 |
| 290 | PLXND1    | TRUE | TRUE |      | 9  | 0.631 | 4  | 2  | 1.105 | 1.445 | 320 |
| 291 | GOLM1     | TRUE | TRUE |      | 9  | 0.654 | 6  | 1  | 1.193 | 1.232 | 321 |
| 292 | DLG5      | TRUE |      |      | 6  | 0.464 | 7  | 8  | 0.682 | 1.387 | 322 |
| 293 | ZNF331    | TRUE |      |      | 18 | 0.411 | 5  | 8  | 0.681 | 1.670 | 323 |
| 294 | ALDOC     |      |      |      | 3  | 0.718 | 2  | 4  | 1.659 | 1.417 | 324 |
| 295 | BAG2      | TRUE |      |      | 7  | 0.560 | 2  | 6  | 0.901 | 1.858 | 327 |
| 296 | NCF4      |      |      |      | 2  | 0.507 | 3  | 1  | 1.695 | 1.831 | 331 |
| 297 | BEX2      | TRUE |      | TRUE | 5  | 0.385 | 6  | 3  | 1.122 | 1.803 | 334 |
| 298 | RAB34     | TRUE |      |      | 12 | 0.663 | 8  | 3  | 0.876 | 1.022 | 335 |
| 299 | SNX19     | TRUE |      |      | 7  | 0.541 | 7  | 9  | 1.315 | 0.997 | 337 |
| 300 | S100B     |      |      |      | 1  | 0.375 | 8  | 5  | 2.141 | 1.387 | 343 |
| 301 | FAM65B    | TRUE | TRUE |      | 7  | 0.358 | 6  | 7  | 0.968 | 1.662 | 348 |
| 302 | C10orf128 |      |      |      | 2  | 0.688 | 3  | 2  | 0.749 | 1.459 | 350 |
| 303 | ZNF230    | TRUE |      |      | 6  | 0.669 | 5  | 10 | 0.852 | 0.829 | 351 |
| 304 | BCAN      | TRUE | TRUE |      | 4  | 0.813 | 7  | 5  | 1.700 | 0.398 | 353 |
| 305 | SIGLEC7   |      |      |      | 5  | 0.667 | 2  | 8  | 0.947 | 1.421 | 355 |
| 306 | CIDEB     | TRUE |      |      | 7  | 0.771 | 3  | 4  | 1.547 | 0.985 | 357 |
| 307 | ZFP82     | TRUE |      |      | 9  | 0.500 | 8  | 6  | 0.912 | 1.226 | 358 |
| 308 | EAPP      | TRUE |      |      | 3  | 0.690 | 6  | 6  | 1.586 | 0.731 | 367 |
| 309 | AOAH      |      |      |      | 2  | 0.489 | 3  | 8  | 1.066 | 1.576 | 368 |
| 310 | CENPN     | TRUE |      |      | 3  | 0.550 | 8  | 2  | 2.071 | 1.065 | 369 |
| 311 | TMEM30B   | TRUE |      |      | 7  | 0.451 | 8  | 6  | 1.524 | 1.220 | 370 |
| 312 | PPP1R9A   | TRUE |      |      | 10 | 0.640 | 5  | 5  | 0.524 | 1.190 | 371 |
| 313 | ZNF627    | TRUE |      |      | 5  | 0.673 | 3  | 8  | 0.574 | 1.200 | 372 |
| 314 | NINJ2     |      |      |      | 2  | 0.546 | 11 | 1  | 1.706 | 1.063 | 374 |
| 315 | ZXDA      | TRUE |      |      | 2  | 0.624 | 7  | 5  | 1.599 | 0.870 | 376 |
| 316 | PDE4D     | TRUE | TRUE |      | 24 | 0.406 | 11 | 7  | 0.746 | 1.292 | 379 |
| 317 | HS6ST1    | TRUE | TRUE |      | 8  | 0.595 | 6  | 9  | 1.032 | 0.911 | 380 |
| 318 | SPRY2     | TRUE |      | TRUE | 8  | 0.437 | 4  | 5  | 1.021 | 1.702 | 381 |

|     |          |      |      |      |    |       |    |    |       |       |     |
|-----|----------|------|------|------|----|-------|----|----|-------|-------|-----|
| 319 | CA2      | TRUE | TRUE |      | 10 | 0.384 | 4  | 3  | 1.510 | 1.835 | 383 |
| 320 | TMEFF1   | TRUE |      | TRUE | 13 | 0.746 | 6  | 7  | 0.968 | 0.632 | 385 |
| 321 | KIAA1244 | TRUE | TRUE |      | 10 | 0.714 | 6  | 7  | 1.286 | 0.639 | 392 |
| 322 | STK32C   | TRUE | TRUE |      | 13 | 0.817 | 5  | 6  | 1.212 | 0.524 | 393 |
| 323 | ANKRD23  |      |      |      | 6  | 0.650 | 7  | 10 | 0.858 | 0.642 | 400 |
| 324 | PTPLAD2  | TRUE |      |      | 5  | 0.367 | 4  | 9  | 0.744 | 1.688 | 401 |
| 325 | NAP1L3   |      |      |      | 3  | 0.426 | 5  | 5  | 1.664 | 1.450 | 403 |
| 326 | ITM2C    | TRUE |      |      | 5  | 0.595 | 4  | 2  | 1.390 | 1.327 | 406 |
| 327 | ZNF514   | TRUE | TRUE |      | 6  | 0.469 | 3  | 8  | 1.285 | 1.511 | 410 |
| 328 | PHACTR2  | TRUE |      |      | 5  | 0.392 | 4  | 7  | 1.494 | 1.562 | 412 |
| 329 | ZC3HAV1L | TRUE |      |      | 9  | 0.645 | 5  | 2  | 0.931 | 1.171 | 415 |
| 330 | TMEM44   | TRUE |      |      | 7  | 0.811 | 6  | 4  | 0.847 | 0.581 | 417 |
| 331 | AGO4     | TRUE |      |      | 8  | 0.527 | 2  | 9  | 0.621 | 1.685 | 419 |
| 332 | PAK6     | TRUE | TRUE |      | 13 | 0.672 | 4  | 7  | 0.330 | 1.067 | 420 |
| 333 | MIAT     | TRUE |      |      | 8  | 0.578 | 6  | 8  | 0.732 | 0.983 | 423 |
| 334 | RINT1    | TRUE |      | TRUE | 2  | 0.657 | 7  | 5  | 1.105 | 0.795 | 424 |
| 335 | RIPK3    | TRUE | TRUE |      | 8  | 0.756 | 4  | 7  | 0.612 | 0.782 | 429 |
| 336 | SLC20A1  | TRUE |      |      | 10 | 0.606 | 5  | 1  | 0.745 | 1.328 | 430 |
| 337 | ZNF35    | TRUE |      |      | 4  | 0.760 | 5  | 7  | 1.306 | 0.529 | 431 |
| 338 | OXR1     | TRUE |      |      | 3  | 0.759 | 5  | 7  | 1.475 | 0.497 | 432 |
| 339 | ARL4A    | TRUE |      |      | 9  | 0.491 | 7  | 4  | 1.474 | 1.177 | 434 |
| 340 | AIFM2    | TRUE | TRUE |      | 6  | 0.647 | 5  | 1  | 1.204 | 1.133 | 435 |
| 341 | B4GALT4  | TRUE |      |      | 5  | 0.656 | 3  | 9  | 0.886 | 1.018 | 441 |
| 342 | OTUD1    | TRUE |      |      | 15 | 0.709 | 7  | 3  | 0.733 | 0.795 | 445 |
| 343 | RHOH     |      |      |      | 3  | 0.451 | 6  | 10 | 1.145 | 1.086 | 446 |
| 344 | DENND5A  | TRUE |      |      | 8  | 0.555 | 5  | 2  | 0.627 | 1.395 | 449 |
| 345 | LILRB1   |      |      |      | 2  | 0.421 | 4  | 5  | 0.780 | 1.662 | 450 |
| 346 | ITPRIPL2 | TRUE | TRUE |      | 8  | 0.767 | 3  | 3  | 0.822 | 1.020 | 452 |
| 347 | ENO2     | TRUE |      |      | 10 | 0.610 | 2  | 8  | 0.688 | 1.444 | 456 |
| 348 | NPRL3    | TRUE |      |      | 5  | 0.656 | 8  | 5  | 1.285 | 0.640 | 459 |
| 349 | EML5     | TRUE | TRUE |      | 12 | 0.520 | 6  | 4  | 0.484 | 1.309 | 462 |
| 350 | AGPAT6   | TRUE |      |      | 5  | 0.811 | 4  | 5  | 1.319 | 0.551 | 463 |
| 351 | TSTD1    | TRUE |      |      | 7  | 0.462 | 3  | 4  | 0.634 | 1.757 | 471 |
| 352 | FAM134B  | TRUE | TRUE |      | 14 | 0.562 | 8  | 4  | 0.827 | 1.000 | 472 |
| 353 | CD164    | TRUE |      |      | 7  | 0.717 | 3  | 5  | 0.316 | 1.113 | 475 |
| 354 | PYROXD2  |      |      |      | 3  | 0.506 | 8  | 8  | 1.597 | 0.787 | 476 |
| 355 | PPP1R3B  | TRUE |      |      | 15 | 0.706 | 5  | 5  | 0.691 | 0.808 | 478 |
| 356 | LTB4R    | TRUE |      |      | 4  | 0.648 | 4  | 5  | 1.564 | 0.889 | 480 |
| 357 | GPR27    | TRUE |      |      | 2  | 0.400 | 4  | 7  | 1.332 | 1.461 | 481 |
| 358 | ZNF18    | TRUE |      |      | 6  | 0.833 | 4  | 5  | 0.670 | 0.592 | 482 |
| 359 | SLC40A1  | TRUE | TRUE |      | 6  | 0.657 | 4  | 3  | 1.657 | 0.948 | 483 |
| 360 | GRHL1    | TRUE | TRUE |      | 14 | 0.483 | 7  | 5  | 0.820 | 1.186 | 485 |
| 361 | IFNLR1   | TRUE |      |      | 9  | 0.656 | 6  | 4  | 1.490 | 0.739 | 486 |
| 362 | SCARF1   |      |      |      | 5  | 0.718 | 4  | 3  | 1.627 | 0.791 | 488 |
| 363 | PTGFRN   | TRUE |      |      | 10 | 0.597 | 6  | 1  | 1.370 | 1.055 | 489 |
| 364 | UPP1     | TRUE |      |      | 14 | 0.463 | 7  | 9  | 0.630 | 1.066 | 490 |
| 365 | DRG2     | TRUE |      |      | 4  | 0.578 | 10 | 5  | 1.069 | 0.742 | 491 |



|     |           |      |      |      |    |       |    |    |       |       |     |
|-----|-----------|------|------|------|----|-------|----|----|-------|-------|-----|
| 366 | BTBD3     | TRUE |      |      | 16 | 0.355 | 7  | 3  | 1.010 | 1.560 | 497 |
| 367 | APOBEC3B  |      |      |      | 2  | 0.852 | 2  | 1  | 1.430 | 2.513 | 29  |
| 368 | S100A9    |      |      |      | 3  | 0.458 | 3  | 1  | 0.965 | 3.230 | 40  |
| 369 | RGCC      | TRUE | TRUE |      | 8  | 0.626 | 2  | 7  | 0.579 | 2.647 | 59  |
| 370 | MYADM     | TRUE |      |      | 17 | 0.849 | 2  | 8  | 0.391 | 2.056 | 64  |
| 371 | PBK       | TRUE |      |      | 4  | 0.687 | 2  | 1  | 1.629 | 2.464 | 78  |
| 372 | SYNE1     | TRUE | TRUE |      | 7  | 0.873 | 2  | 8  | 0.415 | 1.593 | 134 |
| 373 | TOX2      | TRUE | TRUE |      | 14 | 0.431 | 5  | 1  | 0.958 | 2.443 | 137 |
| 374 | CD8A      | TRUE | TRUE |      | 8  | 0.550 | 2  | 5  | 0.480 | 2.485 | 156 |
| 375 | LAIR2     |      |      |      | 2  | 0.748 | 2  | 6  | 0.566 | 1.837 | 176 |
| 376 | CDK5R1    | TRUE |      |      | 13 | 0.697 | 2  | 7  | 0.481 | 1.871 | 189 |
| 377 | KIAA0101  |      |      |      | 2  | 0.439 | 8  | 1  | 1.901 | 1.765 | 209 |
| 378 | H2AFJ     | TRUE |      |      | 7  | 0.854 | 5  | 2  | 1.616 | 0.892 | 224 |
| 379 | GALM      |      |      |      | 2  | 0.496 | 6  | 2  | 1.858 | 1.645 | 236 |
| 380 | PLCB1     | TRUE | TRUE |      | 7  | 0.764 | 2  | 6  | 0.536 | 1.582 | 247 |
| 381 | ACOT4     | TRUE | TRUE |      | 7  | 0.757 | 7  | 5  | 0.553 | 0.985 | 248 |
| 382 | CDKN2A    | TRUE | TRUE | TRUE | 14 | 0.489 | 3  | 2  | 1.398 | 2.001 | 272 |
| 383 | MYNN      | TRUE |      |      | 9  | 0.888 | 4  | 8  | 0.571 | 0.691 | 273 |
| 384 | HTRA4     | TRUE | TRUE |      | 7  | 0.426 | 10 | 1  | 1.787 | 1.563 | 281 |
| 385 | CHFR      | TRUE |      | TRUE | 10 | 0.897 | 2  | 10 | 0.678 | 0.936 | 285 |
| 386 | DUSP4     | TRUE | TRUE |      | 29 | 0.668 | 2  | 5  | 0.551 | 1.771 | 291 |
| 387 | CHCHD3    | TRUE |      |      | 3  | 0.683 | 7  | 1  | 2.185 | 0.953 | 295 |
| 388 | RNASET2   | TRUE | TRUE | TRUE | 13 | 0.814 | 1  | 3  | 0.384 | 1.995 | 317 |
| 389 | PSEN2     | TRUE | TRUE |      | 9  | 0.904 | 5  | 3  | 0.584 | 0.690 | 326 |
| 390 | ANKRD50   | TRUE |      |      | 11 | 0.733 | 5  | 2  | 1.388 | 0.983 | 342 |
| 391 | CBFA2T3   | TRUE | TRUE | TRUE | 25 | 0.883 | 8  | 2  | 1.101 | 0.443 | 346 |
| 392 | ORAI3     | TRUE |      |      | 12 | 0.886 | 2  | 2  | 0.679 | 1.225 | 352 |
| 393 | NELL2     | TRUE |      |      | 9  | 0.690 | 2  | 6  | 0.556 | 1.517 | 373 |
| 394 | CDCA7L    | TRUE |      |      | 7  | 0.479 | 4  | 2  | 0.781 | 1.802 | 375 |
| 395 | FAM89A    | TRUE | TRUE |      | 13 | 0.966 | 2  | 4  | 0.847 | 0.843 | 386 |
| 396 | BIN2      |      |      |      | 7  | 0.781 | 1  | 10 | 0.487 | 1.589 | 387 |
| 397 | UBASH3A   |      |      |      | 2  | 0.756 | 2  | 1  | 1.443 | 1.402 | 390 |
| 398 | INHBE     |      |      |      | 2  | 0.471 | 5  | 2  | 1.506 | 1.548 | 391 |
| 399 | MBP       | TRUE | TRUE |      | 15 | 0.806 | 2  | 6  | 0.404 | 1.181 | 411 |
| 400 | CENPV     | TRUE |      |      | 8  | 0.478 | 2  | 5  | 0.880 | 1.963 | 416 |
| 401 | YPEL1     | TRUE |      |      | 9  | 0.821 | 1  | 10 | 0.384 | 1.449 | 418 |
| 402 | LY9       |      |      |      | 1  | 0.464 | 7  | 2  | 2.083 | 1.249 | 421 |
| 403 | AGTRAP    | TRUE |      |      | 6  | 0.481 | 5  | 8  | 0.557 | 1.347 | 422 |
| 404 | SSBP2     | TRUE |      |      | 16 | 0.696 | 1  | 7  | 0.588 | 1.850 | 433 |
| 405 | BRD1      | TRUE |      |      | 3  | 0.428 | 10 | 7  | 1.948 | 0.942 | 436 |
| 406 | FAM76B    | TRUE |      |      | 4  | 0.581 | 6  | 10 | 0.536 | 0.887 | 439 |
| 407 | RALBP1    | TRUE |      |      | 10 | 0.942 | 1  | 2  | 1.545 | 1.285 | 442 |
| 408 | PDE8A     | TRUE | TRUE |      | 18 | 0.683 | 2  | 8  | 0.273 | 1.368 | 444 |
| 409 | LINC00294 |      |      |      | 2  | 0.579 | 11 | 7  | 0.536 | 0.770 | 447 |
| 410 | KLF7      | TRUE |      |      | 7  | 0.779 | 4  | 4  | 0.497 | 0.844 | 458 |
| 411 | TUSC1     | TRUE |      |      | 8  | 0.654 | 8  | 1  | 0.689 | 0.950 | 470 |
| 412 | CRYBB2    |      |      |      | 3  | 0.479 | 7  | 8  | 1.315 | 0.968 | 473 |

|     |         |      |      |  |    |       |   |    |       |       |     |
|-----|---------|------|------|--|----|-------|---|----|-------|-------|-----|
| 413 | ZNF649  |      |      |  | 6  | 0.492 | 7 | 10 | 1.285 | 0.840 | 474 |
| 414 | PDE4A   | TRUE | TRUE |  | 33 | 0.641 | 2 | 7  | 0.364 | 1.447 | 477 |
| 415 | YPEL2   | TRUE | TRUE |  | 14 | 0.658 | 3 | 2  | 0.349 | 1.396 | 484 |
| 416 | ZNF702P | TRUE | TRUE |  | 4  | 0.647 | 8 | 2  | 1.909 | 0.657 | 487 |
| 417 | SLC22A3 | TRUE | TRUE |  | 10 | 0.773 | 4 | 2  | 0.857 | 0.846 | 492 |
| 418 | FEZ1    | TRUE |      |  | 6  | 0.406 | 1 | 10 | 1.065 | 2.242 | 496 |
| 419 | ABCG1   | TRUE | TRUE |  | 17 | 0.731 | 3 | 1  | 0.548 | 1.202 | 498 |
