# Supplementary material
Source: PubMed Central journal article supplement (PMC4504988)
Supplement: NIHMS706165-supplement-Table_S4.pdf [file NIHMS706165-supplement-Table_S4.pdf]

**Table S4. Significantly enriched functional groups for 174 hypermethylated genes in Ingenuity Pathway Analysis**

| Diseases or Functions Annotation                 | p-Value  | Gene num | Genes                                                                                                                                                                                                                                                                                                                                                                                                                  |
|--------------------------------------------------|----------|----------|------------------------------------------------------------------------------------------------------------------------------------------------------------------------------------------------------------------------------------------------------------------------------------------------------------------------------------------------------------------------------------------------------------------------|
| <b>Cell Death</b>                                |          |          |                                                                                                                                                                                                                                                                                                                                                                                                                        |
| cell death of immune cells                       | 1.37E-08 | 25       | ADAM8, ARRB1, BCL2L11, CD300A, CD7, DAPK1, DLL1, FCER1G, GSN, IRF8, IRS2, ITGAM, LEF1, MVP, MX1, NFATC1, PAWR, PCTP, PTPN6, PYCARD, TNFRSF18, TNFRSF4, TNFSF11, TWSG1, ZBTB16                                                                                                                                                                                                                                          |
| necrosis                                         | 4.84E-06 | 51       | ADAM8, ADAMTS1, ARRB1, ASNS, BCL2L11, CD300A, CD7, CTBP2, CTH, CYB5A, DAPK1, DDX3X, DLL1, FCER1G, GAS1, GNLY, GPX7, GSN, HIC1, IGF1R, INPP5A, IRF8, IRS2, ITGAM, ITGAV, LEF1, MSRB2, MVP, MX1, MYO6, NACC2, NEK6, NFATC1, PAWR, PCTP, PDE4B, PIK3IP1, PLAC8, PLK2, PRDX2, PTCH1, PTPN6, PYCARD, RGS3, TMCC3, TNFRSF18, TNFRSF4, TNFSF11, TP53INP1, TWSG1, ZBTB16                                                       |
| cell death                                       | 3.30E-05 | 59       | ADAM8, ADAMTS1, ARRB1, ASNS, BCL2L11, CD300A, CD7, CTBP2, CTH, CYB5A, DAPK1, DDX3X, DLL1, FCER1G, GAS1, GNLY, GPHN, GPX7, GSN, HIC1, HPGD, IGF1R, IL12RB2, INPP5A, IRF8, IRS2, ITGAM, ITGAV, KLF11, KLRF1, LEF1, MAF, MSRB2, MVP, MX1, MYO6, NACC2, NEK6, NFATC1, PAWR, PCTP, PDE4B, PIK3IP1, PLAC8, PLK2, PRDX2, PTCH1, PTPN6, PYCARD, RGS3, RNF130, TMCC3, TNFRSF18, TNFRSF4, TNFSF11, TP53INP1, TSPO, TWSG1, ZBTB16 |
| <b>Cell Activation</b>                           |          |          |                                                                                                                                                                                                                                                                                                                                                                                                                        |
| activation of T lymphocytes                      | 4.75E-07 | 16       | BCL2L11, C3AR1, CD7, CRY1, DLL1, FCER1G, IL12RB2, IRF8, ITGAM, ITGAV, NEDD4, PTPN6, PYCARD, TNFRSF18, TNFRSF4, TNFSF11                                                                                                                                                                                                                                                                                                 |
| activation of leukocytes                         | 1.25E-05 | 20       | BCL2L11, C3AR1, CD300A, CD7, CRY1, DLL1, FCER1G, GNLY, IL12RB2, IRF8, ITGAM, ITGAV, KLRF1, MAF, NEDD4, PTPN6, PYCARD, TNFRSF18, TNFRSF4, TNFSF11                                                                                                                                                                                                                                                                       |
| cell-surface receptor-linked signal transduction | 8.84E-05 | 10       | ADAMTS1, AKAP7, DOK2, FCER1G, GAS1, IL12RB2, ITGAV, PTCH1, PTPN6, TNFSF11                                                                                                                                                                                                                                                                                                                                              |
| protein kinase cascade                           | 9.55E-04 | 12       | DAPK1, DDX3X, DOK2, IGF1R, ITGAV, NEK6, PLK2, PTPN6, PYCARD, SOCS6, TLE1, TNFSF11                                                                                                                                                                                                                                                                                                                                      |
| <b>Homeostasis and Differentiation</b>           |          |          |                                                                                                                                                                                                                                                                                                                                                                                                                        |
| cellular homeostasis                             | 5.73E-09 | 40       | ADAMTS1, ARRB1, BCL2L11, C3AR1, CAMK1, CD300A, CD52, CD7, CYB5A, DAPK1, DLL1, DOK2, FCER1G, GNA15, GNLY, GSN, IGF1R, IL12RB2, IRF8, IRS2, ITGAV, LEF1, LXN, MAF, MSRB2, NEDD4, NFATC1, PAWR, PDE4B, PRDX2, PTCH1, PTPN6, PYCARD, TESPA1, THEMIS2, TNFRSF4, TNFSF11, TWSG1, ULK2, ZBTB16                                                                                                                                |
| T cell development                               | 1.08E-07 | 20       | ARRB1, BCL2L11, C3AR1, DLL1, DOK2, FCER1G, IGF1R, IL12RB2, IRF8, LEF1, MAF, NFATC1, PRDX2, PTPN6, TESPA1, THEMIS2, TNFRSF4, TNFSF11, TWSG1, ZBTB16                                                                                                                                                                                                                                                                     |
| homeostasis of leukocytes                        | 1.12E-07 | 21       | ARRB1, BCL2L11, C3AR1, DLL1, DOK2, FCER1G, IGF1R, IL12RB2, IRF8, LEF1, MAF, NFATC1, PDE4B, PRDX2, PTPN6, TESPA1, THEMIS2, TNFRSF4, TNFSF11, TWSG1, ZBTB16                                                                                                                                                                                                                                                              |
| <b>Proliferation and Cancer</b>                  |          |          |                                                                                                                                                                                                                                                                                                                                                                                                                        |
| proliferation of lymphocytes                     | 1.19E-06 | 23       | BCL2L11, CTH, DOK2, FCER1G, IL12RB2, IRF8, IRS2, ITGAM, LEF1, MVP, NFATC1, PAWR, PLEKHA1, PRDX2, PTPN6, PYCARD, SH2B3, TESPA1, TNFRSF18, TNFRSF4, TNFSF11, TP53INP1, ZBTB16                                                                                                                                                                                                                                            |

|                                       |          |     |                                                                                                                                                                                                                                                                                                                                                                                                                                                                                                                                                                                                                                                                                                                                                                                                                                                                                                                                                               |
|---------------------------------------|----------|-----|---------------------------------------------------------------------------------------------------------------------------------------------------------------------------------------------------------------------------------------------------------------------------------------------------------------------------------------------------------------------------------------------------------------------------------------------------------------------------------------------------------------------------------------------------------------------------------------------------------------------------------------------------------------------------------------------------------------------------------------------------------------------------------------------------------------------------------------------------------------------------------------------------------------------------------------------------------------|
| proliferation of cells                | 7.71E-06 | 64  | ADAMTS1, ARHGAP5, ARRB1, ASCL2, ASNS, BCL2L11, C3AR1, CRY1, CTBP2, CTH, DAPK1, DDX3X, DLL1, DOK2, EIF5A2, FCER1G, FHL1, GAS1, GBP2, GNA15, GNLY, GSN, HHEX, HIC1, HPGD, IGF1R, IL12RB2, IRF8, IRS2, ITGAM, ITGAV, KLF11, LEF1, LTBP3, LXN, MVP, MX1, MYH10, NACC2, NFATC1, NREP, NRIP1, PAWR, PCYOX1, PIK3IP1, PLAC8, PLEKHA1, PLK2, PRDX2, PTCH1, PTPN6, PYCARD, SH2B3, SOCS6, TESPA1, TLE1, TNFRSF18, TNFRSF4, TNFSF11, TP53INP1, TSPO, ZBTB16, ZFH3, ZSCAN18                                                                                                                                                                                                                                                                                                                                                                                                                                                                                               |
| cell cycle progression                | 1.72E-05 | 26  | ARRB1, ASNS, BCL2L11, CEP192, GAS1, GBP2, HHEX, HPGD, IGF1R, IRS2, LEF1, MAP9, MYH10, NEK6, NFATC1, PAWR, PCYOX1, PER3, PLK2, PTCH1, PTPN6, TNFRSF18, TNFSF11, TP53INP1, ZBTB16, ZFH3                                                                                                                                                                                                                                                                                                                                                                                                                                                                                                                                                                                                                                                                                                                                                                         |
| hyperplasia                           | 1.26E-04 | 16  | BCL2L11, DOK2, GNA15, GPX7, IGF1R, IL12RB2, IRF8, IRS2, MX1, PAWR, PTCH1, SH2B3, TNFRSF18, TNFRSF4, TNFSF11, ZBTB16                                                                                                                                                                                                                                                                                                                                                                                                                                                                                                                                                                                                                                                                                                                                                                                                                                           |
| Cancer                                | 8.53E-03 | 126 | ADAM8, ADAMTS1, AKAP7, ALDH5A1, ARHGAP5, ARRB1, ASCL2, ASNS, B3GALNT1, BCL2L11, C3AR1, CAMK1, CD300A, CD52, CEP192, CRY1, CTBP2, CTH, DAPK1, DCBLD1, DDX3X, DLL1, DOCK5, DOK2, DPEP2, ENPP4, FHL1, FILIP1L, GALNT11, GAS1, GBP2, GNA15, GNB4, GNLY, GPHN, GPR114, GPR125, GPR137B, GPX7, GSN, HIC1, HIST2H2BE, HPGD, HSD17B11, IGF1R, IL12RB2, INPP5A, IRF8, IRS2, ITGAM, ITGAV, KIF16B, KLF11, KLRF1, LEF1, LLGL2, LPAR6, LRP12, MAF, MAP9, MSRB2, MVP, MX1, MYH10, MYO6, NAPEPLD, NEDD4, NEK6, NFATC1, NREP, NRIP1, PAM, PATL2, PAWR, PCYOX1, PDE4B, PER3, PIK3IP1, PLEKHA1, PLK2, PRDX2, PSTPIP2, PTCH1, PTPN6, PYCARD, RAB37, RGS3, RHOBTB3, RNF130, RREB1, SBF2, SCRIN1, SERPINB6, SFMBT2, SH2B3, SH3TC1, SLC25A13, SLCO3A1, SLFN12, SOCS6, SPOCK2, SRSF11, SYTL2, TCEAL3, TESPA1, TET2, THEMIS2, TLE1, TMCC3, TNFRSF18, TNFRSF4, TNFSF11, TP53INP1, TRIM44, ULK2, ZBTB16, ZFH3, ZFP3, ZNF280D, ZNF300, ZNF32, ZNF395, ZNF518A, ZNF518B, ZNF605, ZSCAN18 |
| <b>Motility</b>                       |          |     |                                                                                                                                                                                                                                                                                                                                                                                                                                                                                                                                                                                                                                                                                                                                                                                                                                                                                                                                                               |
| cell movement                         | 5.76E-06 | 43  | ADAM8, ADAMTS1, ARHGAP5, ARRB1, ASNS, C3AR1, CAMK1, CRY1, CTBP2, DDX3X, DLL1, DOK2, FCER1G, FHL1, GNLY, GSN, HHEX, HIC1, HPGD, IGF1R, IRF8, IRS2, ITGAM, ITGAV, LEF1, MX1, MYH10, NEDD4, NFATC1, NREP, PDE4B, PIK3IP1, PRDX2, PTPN6, PYCARD, RGS3, SH2B3, TNFRSF18, TNFRSF4, TNFSF11, TP53INP1, TSPO, ZBTB16                                                                                                                                                                                                                                                                                                                                                                                                                                                                                                                                                                                                                                                  |
| chemotaxis                            | 2.43E-04 | 15  | ARRB1, C3AR1, FCER1G, GNLY, GSN, IGF1R, ITGAM, ITGAV, LEF1, MYH10, NEDD4, PDE4B, PTPN6, RGS3, TNFSF11                                                                                                                                                                                                                                                                                                                                                                                                                                                                                                                                                                                                                                                                                                                                                                                                                                                         |
| leukocyte migration                   | 1.84E-03 | 19  | ADAM8, ARRB1, C3AR1, CAMK1, FCER1G, GNLY, GSN, ITGAM, ITGAV, NFATC1, PDE4B, PTPN6, PYCARD, RGS3, SH2B3, TNFRSF18, TNFRSF4, TNFSF11, ZBTB16                                                                                                                                                                                                                                                                                                                                                                                                                                                                                                                                                                                                                                                                                                                                                                                                                    |
| <b>Regulation of transcription</b>    |          |     |                                                                                                                                                                                                                                                                                                                                                                                                                                                                                                                                                                                                                                                                                                                                                                                                                                                                                                                                                               |
| activation of DNA endogenous promoter | 5.07E-04 | 22  | ARRB1, ASCL2, CRY1, DDX3X, DLL1, HHEX, HIC1, IRF8, KLF11, LEF1, MAF, MYO6, NFATC1, NRIP1, PAWR, PER3, PTCH1, RREB1, TLE1, TNFSF11, ZBTB16, ZFH3                                                                                                                                                                                                                                                                                                                                                                                                                                                                                                                                                                                                                                                                                                                                                                                                               |
| expression of RNA                     | 7.20E-03 | 33  | ARRB1, ASCL2, CRY1, CTBP2, DAPK1, DDX3X, DLL1, HHEX, HIC1, IGF2BP2, IRF8, ITGAM, KLF11, LEF1, MAF, MSRB2, MYO6, NEK6, NFATC1, NRIP1, PAWR, PER3, PLK2, PSTPIP2, PTCH1, PTPN6, RREB1, SH2B3, TLE1, TNFRSF4, TNFSF11, ZBTB16, ZFH3                                                                                                                                                                                                                                                                                                                                                                                                                                                                                                                                                                                                                                                                                                                              |
